# Supplementary material for: Hybrid approach to obtain high-quality BaMO3 perovskite nanocrystals
Source: Royal Society of Chemistry journal article supplement (doi:10.1039/d0ra03861j), 2020-01-01
Supplement: d0ra03861j1.pdf [file d0ra03861j1.pdf]

## SUPPORTING INFORMATION

### Hybrid approach to obtain high-quality BaMO<sub>3</sub> perovskite nanocrystals

Natalia Chamorro,<sup>a, b</sup> Jordi Martínez-Esaín,<sup>a, b</sup> Teresa Puig,<sup>b</sup> Xavier Obradors,<sup>b</sup> Josep Ros,<sup>a</sup> Ramón Yáñez,<sup>a</sup> and Susagna Ricart.<sup>b, \*</sup>

<sup>a</sup>Departament de Química, Universitat Autònoma de Barcelona, 08193 Bellaterra, Catalonia, Spain.

<sup>b</sup>Institut de Ciència de Materials de Barcelona (ICMAB-CSIC), 08193 Bellaterra, Catalonia. Spain.

Address of corresponding author\*: [ricart@icmab.es](mailto:ricart@icmab.es)

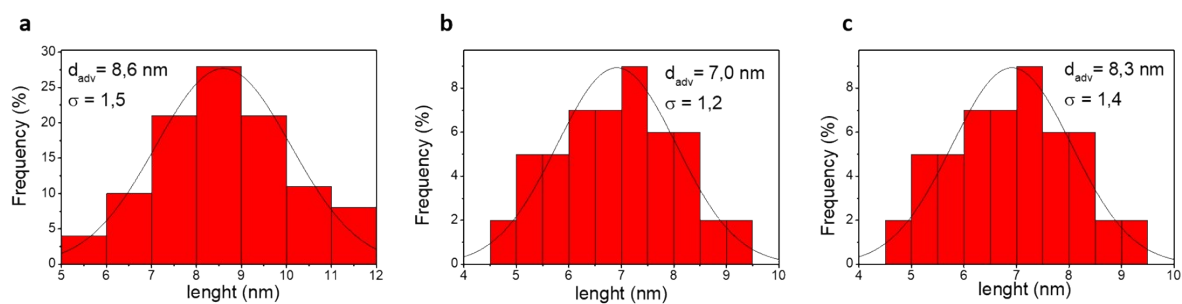

**Figure S1.** Histogram NCs distribution from the Figure 1 being BaZrO<sub>3</sub> (a), BaHfO<sub>3</sub> (b) and BaTiO<sub>3</sub> (c).

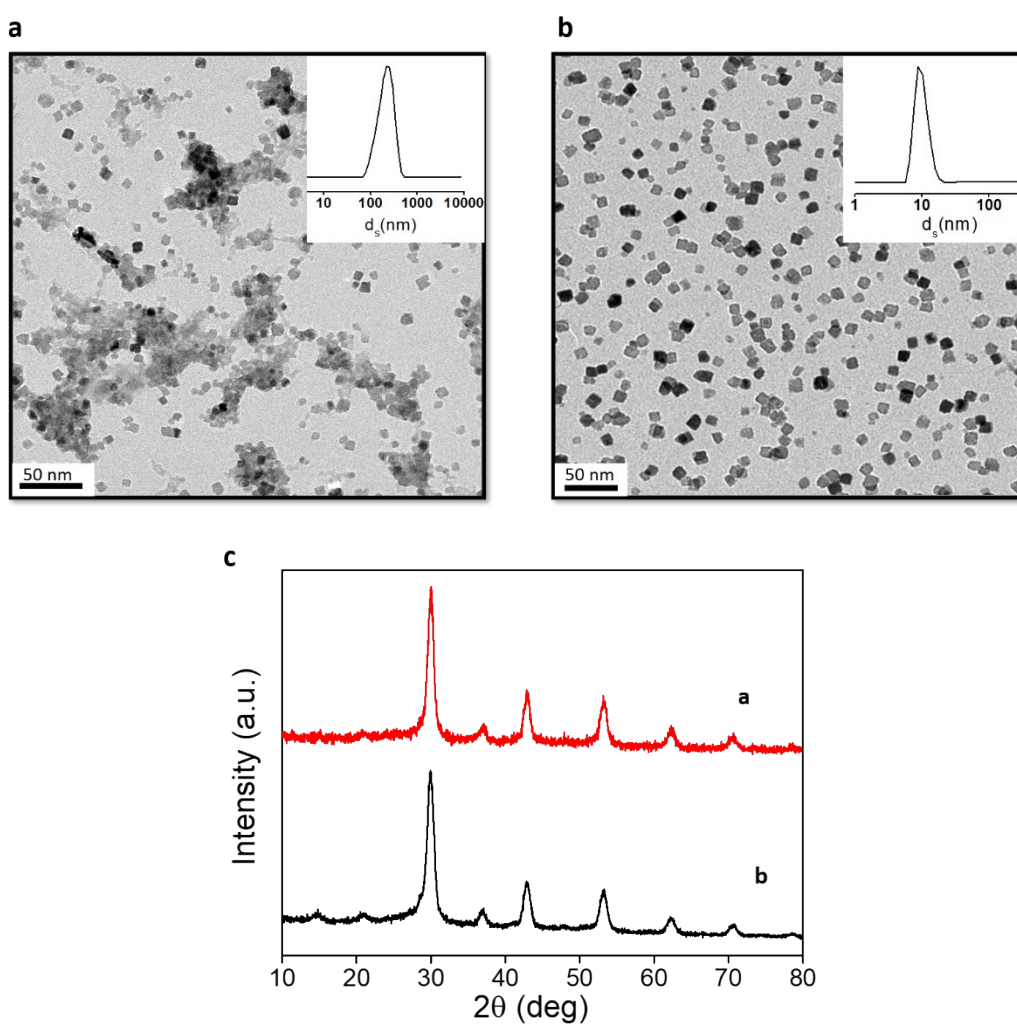

**Figure S2.** TEM and DLS measurements of BaZrO<sub>3</sub> NCs at (a) stoichiometric Ba:Zr (3.5:3.5 mmol) and (b) non-stoichiometric Ba:Zr (3.5:2.8 mmol), (c) XRD pattern for stoichiometric (red) on the graph and non-stoichiometric (black), without showing any different phases or impurities.

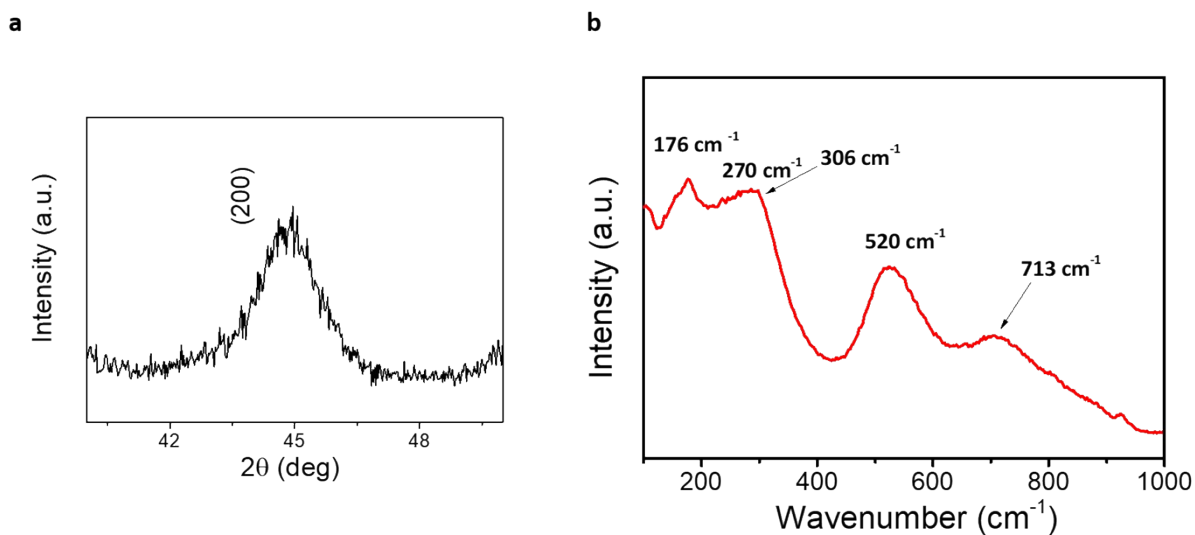

**Figure S3** (a) XRD zoom on 45 ° of BaTiO<sub>3</sub> NCs synthesized at 180 °C for 1 hour, showing the theoretical position where it should be a split peak in a tetragonal phase (b) Raman spectroscopy of BaTiO<sub>3</sub> powder at room temperature, without a sign of sharp peak on 306 cm<sup>-1</sup> and well-defined peak on 713 cm<sup>-1</sup> as the footprint of the tetragonal phase.

**Table S1.** Summary of sizes (TEM and Scherrer equation) at different temperatures.

| NCs                | Temperature<br>(°C) | TEM<br>(nm) | Scherrer size<br>(nm) |
|--------------------|---------------------|-------------|-----------------------|
| BaZrO <sub>3</sub> | 100                 | -           | -                     |
| BaZrO <sub>3</sub> | 180                 | 8.6 ± 1.5   | 8.2                   |
| BaHfO <sub>3</sub> | 100                 | -           | -                     |
| BaHfO <sub>3</sub> | 180                 | 7.0 ± 1.2   | 6.8                   |
| BaTiO <sub>3</sub> | 100                 | 8.2 ± 1.6   | 7.4                   |
| BaTiO <sub>3</sub> | 180                 | 8.3 ± 1.4   | 7.8                   |

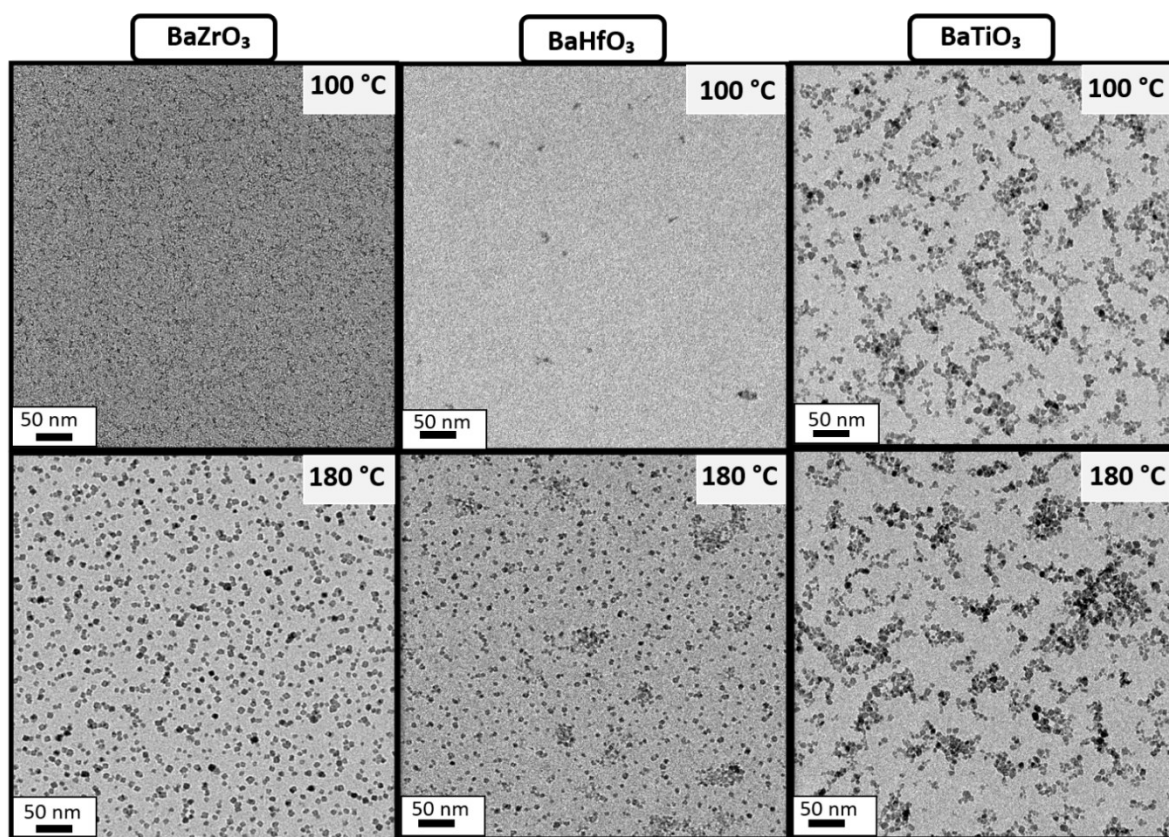

**Figure S4.** TEM images of BaZrO<sub>3</sub>, BaHfO<sub>3</sub> and BaTiO<sub>3</sub> synthesised via standard procedure by using 1 mL of ammonia for 1 hour at 100 and 180 °C.

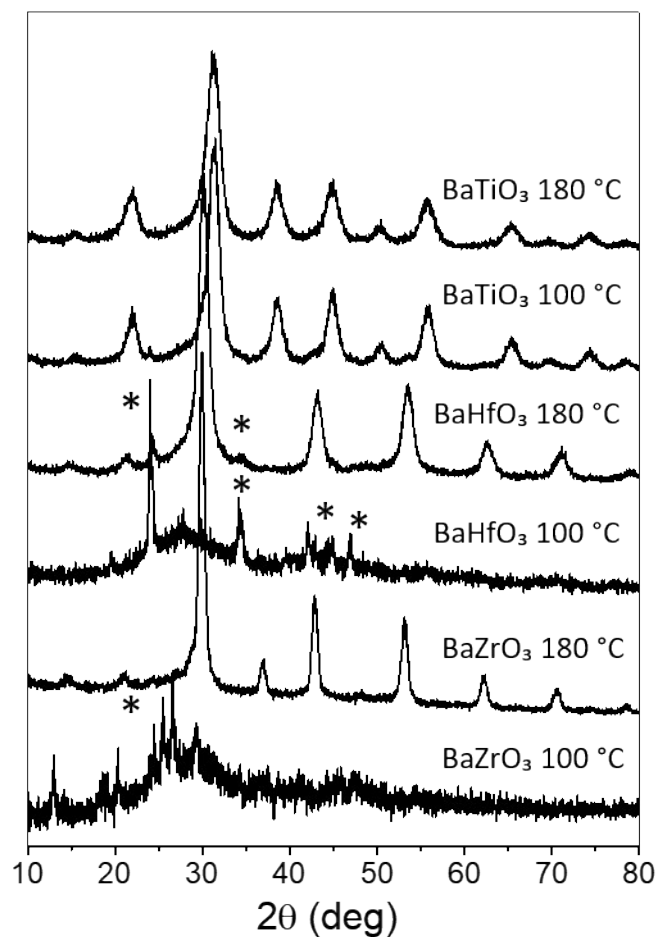

**Figure S5.** XRD pattern of BaZrO<sub>3</sub>, BaHfO<sub>3</sub> and BaTiO<sub>3</sub> synthesized via standard procedure by using 1 mL of ammonia for 1 hour at 100 and 180 °C. In the case of BaMO<sub>3</sub> (M = Zr and Hf) at 100 °C the main presence are impurities coming from the \*BaCO<sub>3</sub> without a final crystal formation. BaHfO<sub>3</sub> at 180 °C shows a \*BaCO<sub>3</sub> peak suggesting a 5% of impurity.

**Table S2.** TEM and Scherrer size of the three different perovskite NCs at 180 °C for 1 hour and 24 hours of reaction.

| NCs                | Time<br>(hours) | TEM size<br>(nm) | Scherrer size<br>(nm) |
|--------------------|-----------------|------------------|-----------------------|
| BaZrO <sub>3</sub> | 1               | 8.6 ± 1.5        | 8.2                   |
| BaZrO <sub>3</sub> | 24              | 8.8 ± 1.7        | 8.5                   |
| BaHfO <sub>3</sub> | 1               | 7.0 ± 1.2        | 6.8                   |
| BaHfO <sub>3</sub> | 24              | 6.8 ± 1.4        | 6.4                   |
| BaTiO <sub>3</sub> | 1               | 8.3 ± 1.4        | 7.8                   |
| BaTiO <sub>3</sub> | 24              | 8.0 ± 1.3        | 7.2                   |

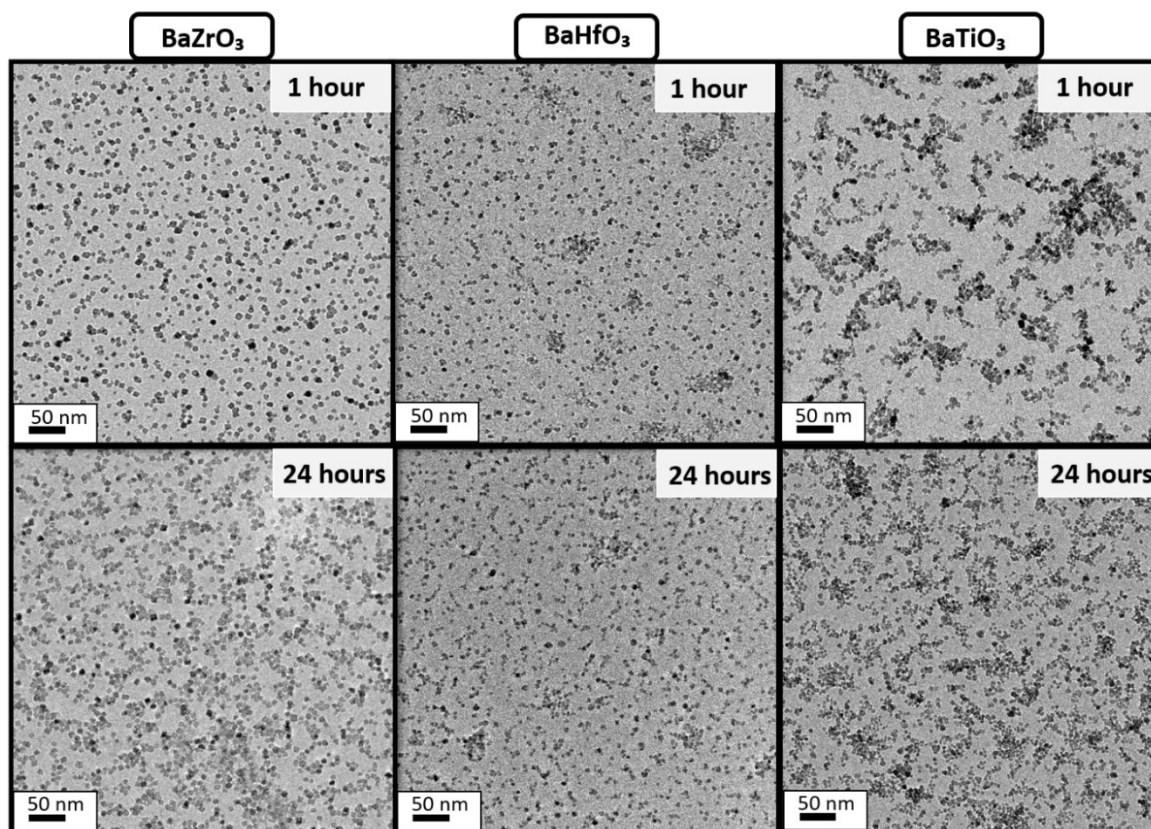

**Figure S6.** TEM patterns from BaZrO<sub>3</sub> and BaHfO<sub>3</sub> NCs at 180 °C and BaTiO<sub>3</sub> NCs at 100 °C synthesized via standard procedure by using 1 mL of ammonia for 1 hour and 24 hours.

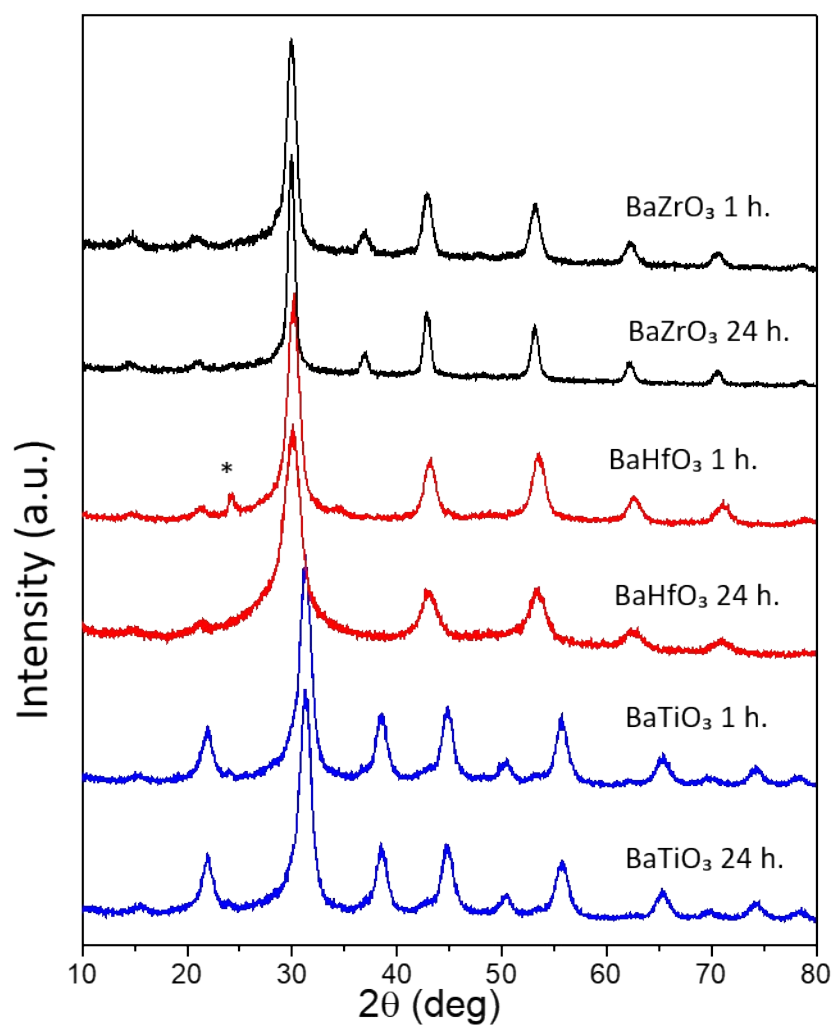

**Figure S7.** XRD diffraction patterns from BaZrO<sub>3</sub> and BaHfO<sub>3</sub> NCs at 180 °C and BaTiO<sub>3</sub> NCs at 100 °C synthesised via standard procedure by using 1 mL of ammonia for 1 hour and 24 hours. BaHfO<sub>3</sub> at 180 °C shows a \*BaCO<sub>3</sub> peak suggesting a 5% of impurity.

a

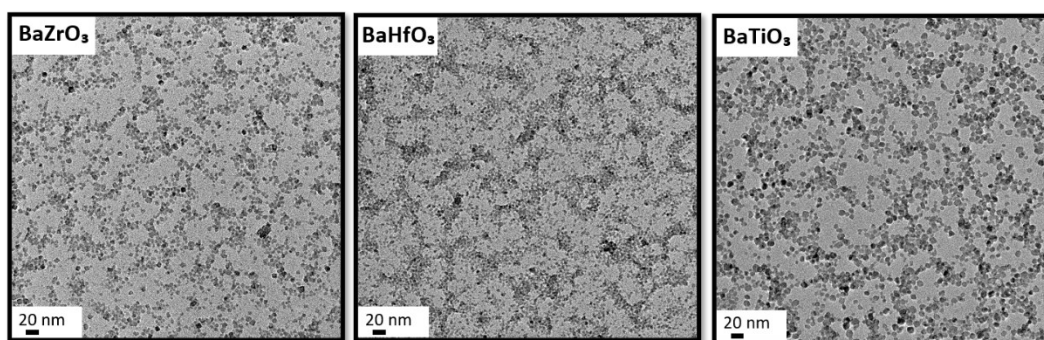

b

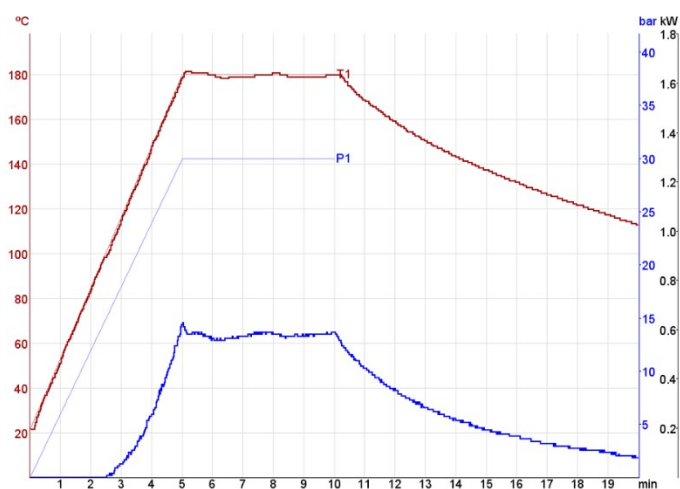

**Figure S8. (a)** TEM image for BaZrO<sub>3</sub>, BaHfO<sub>3</sub> and BaTiO<sub>3</sub> NCs synthesised by using microwave activation, with a ramp of 36 °C/min and dwell during 5 minutes at 180 °C (BaZrO<sub>3</sub>, BaHfO<sub>3</sub>) and 100 °C (BaTiO<sub>3</sub>). The methodology was made using 0.5 mL of H<sub>2</sub>O instead of ammonia. **(b)** An example of BaZrO<sub>3</sub> microwave profile (temperature and pressure).

**Table S3.** Table showing TEM and Scherrer sizes using three different metal precursors and the microwave methodology.

| Metal precursor      | Size TEM (nm) | Scherrer size (nm) |
|----------------------|---------------|--------------------|
| Zr(OBu) <sub>4</sub> | 5.8 ± 1.2     | 5.3                |
| Hf(OBu) <sub>4</sub> | 4.5 ± 0.8     | 4.1                |
| Ti(OBu) <sub>4</sub> | 6.3 ± 1.1     | 5.9                |



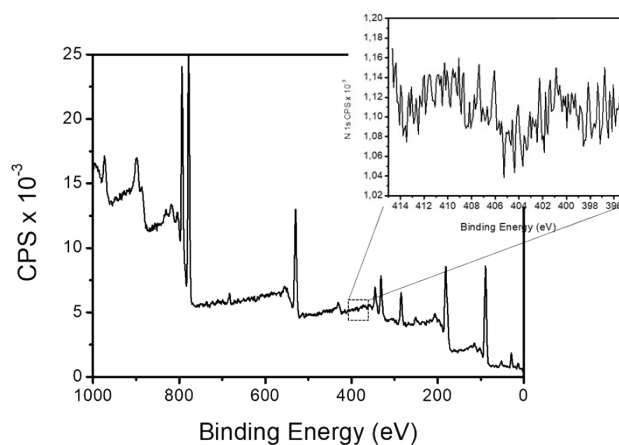

**Figure S9.** XPS analysis of BaZrO<sub>3</sub> NCs synthesized with 1 mL of ammonia at 180 °C for 1 hour. It shows the lack of nitrogen presence on the NC surface.

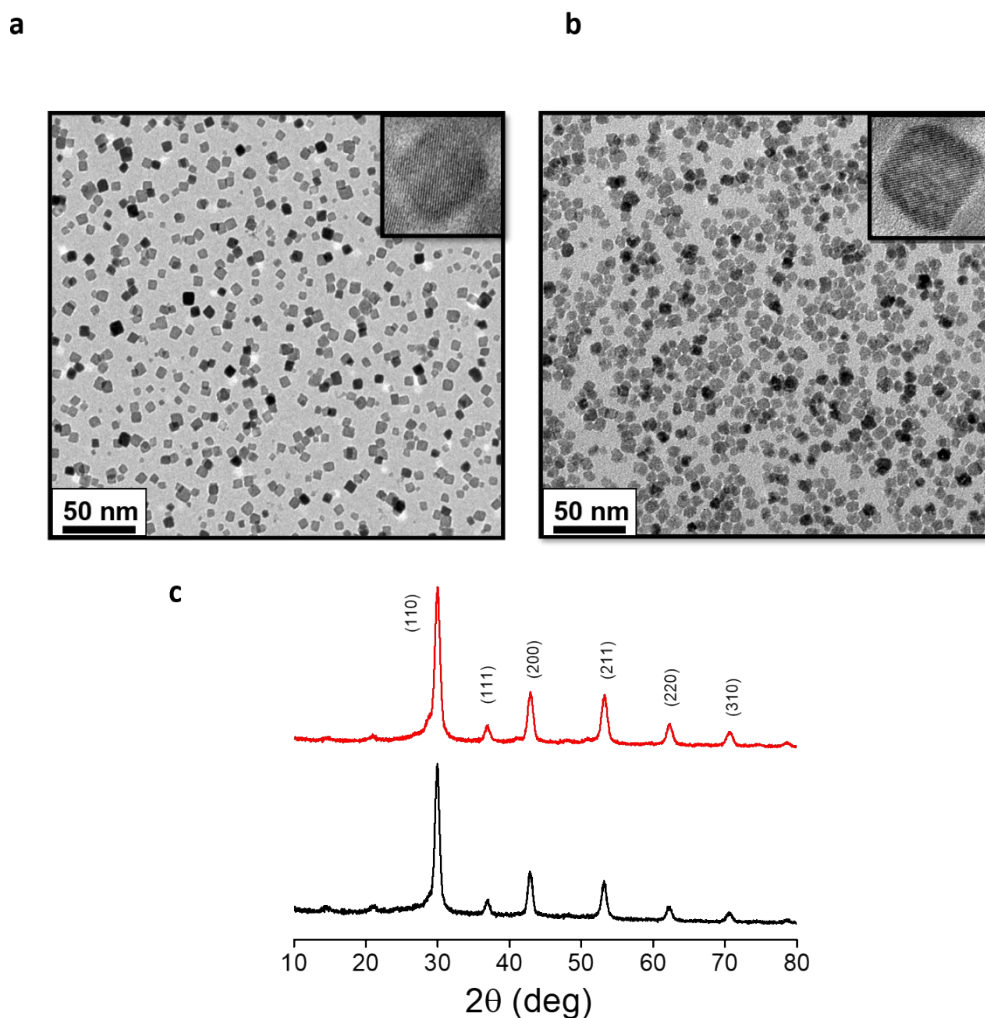

**Figure S10.** (a) (HR)TEM of BaZrO<sub>3</sub> NCs synthesized via standard procedure by using 0.7 mL of water instead of ammonia at 180 °C for 1 hour. (b) (HR)TEM of BaZrO<sub>3</sub> NCs synthesized via standard procedure by using 1 mL of ammonia 30% v/v (i.e. 0.3 mL and 0.7 mL water) at 180 °C for 1 hour (c) the respective XRD cubic pattern from (a) black and (b) red.

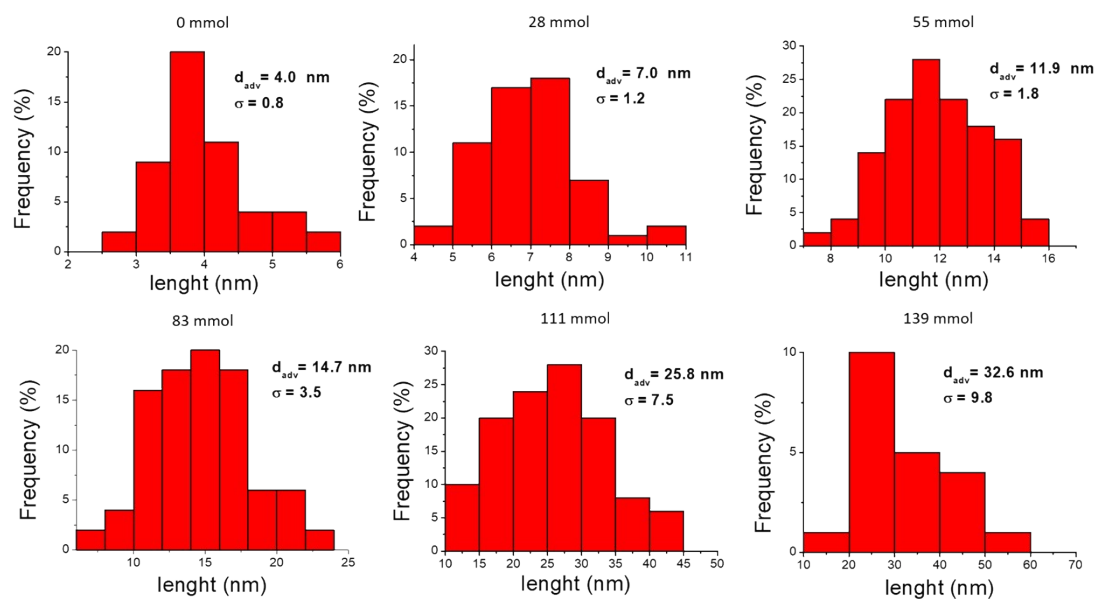

**Figure S11.** Histograms of the BaZrO<sub>3</sub> NCs obtained with different amount of water (0, 28, 55, 83, 111 and 139 mmol) corresponding to TEM images in Figure 3.

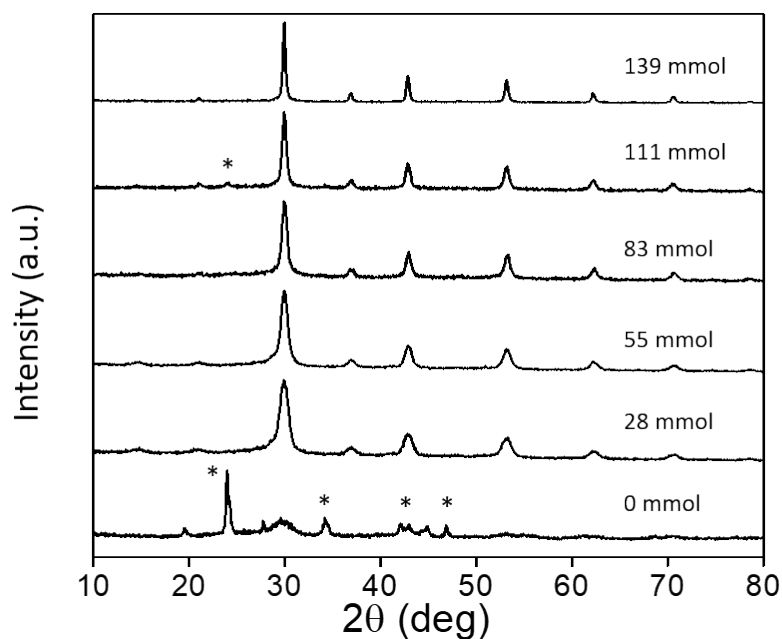

**Figure S12.** XRD pattern corresponding to the NCs showed in Figure 3 for the different amounts of water from 0 mmol to 139 mmol. XRD at 0 mmol also includes the main peaks of \*BaCO<sub>3</sub> as the main impurity of this synthesis. 111 mmol pattern also shows a subtle \*BaCO<sub>3</sub> peak suggesting an impurity quantification of 4% from BaCO<sub>3</sub>.

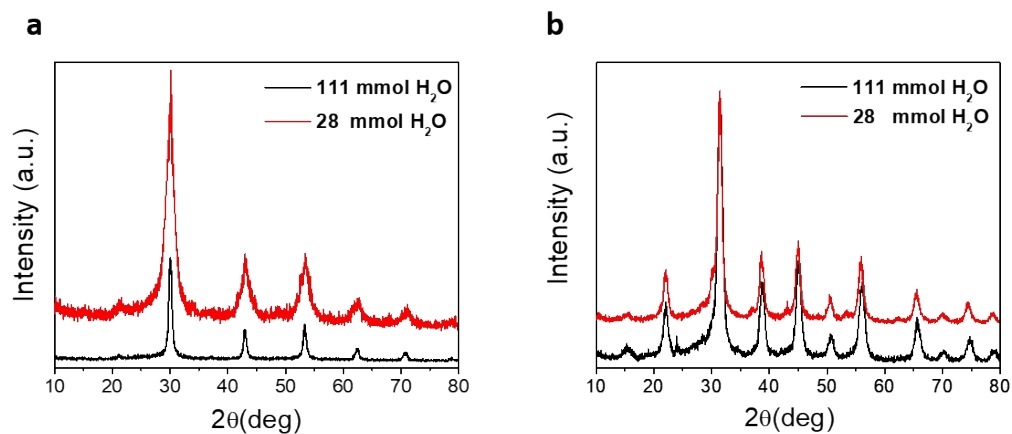

**Figure S13.** XRD diffraction patterns for (a) BaHfO<sub>3</sub> and (b) BaTiO<sub>3</sub> NCs synthesised via standard procedure by adding 28 and 111 mmols of water instead of ammonia at 180 °C (BaHfO<sub>3</sub>) and at 100 °C (BaTiO<sub>3</sub>).
